# Supplementary material for: Yap- and Cdc42-Dependent Nephrogenesis and Morphogenesis during Mouse Kidney Development
Source: PubMed Central journal article supplement (PMC3605093; doi:10.1371/journal.pgen.1003380), 2013-03-21
Supplement: pgen.1003380.s016.pdf [file pgen.1003380.s016.pdf]

**Table S1**

| <b>Symbol</b>        | <b>Name</b>                                                                     | <b>Fold change</b> | <b>Confirmed</b> |
|----------------------|---------------------------------------------------------------------------------|--------------------|------------------|
| <b>Upregulated</b>   |                                                                                 |                    |                  |
| <i>Actb</i>          | Actin, beta                                                                     | 2.833              | N                |
| <i>Ret</i>           | Ret proto-oncogene                                                              | 1.779              | Y                |
| <i>Raldh3</i>        | Retinaldehyde dehydrogenase 3                                                   | 1.581              | Y                |
| <i>Fgf10</i>         | Fibroblast growth factor 10                                                     | 1.566              | Y                |
| <b>Downregulated</b> |                                                                                 |                    |                  |
| <i>Ly6a</i>          | Lymphocyte antigen 6 complex, locus A                                           | -2.303             | N                |
| <i>Meox2</i>         | Mesenchyme homeobox 2                                                           | -2.128             | Y                |
| <i>Pdzk1</i>         | PDZ domain containing 1                                                         | -2.039             | N                |
| <i>Sostdc1</i>       | Sclerostin domain containing 1                                                  | -1.963             | Y                |
| <i>Yap</i>           | Yes-associated protein                                                          | -1.813             | Y                |
| <i>Pitrm1</i>        | Pitriylsin metallopeptidase 1                                                   | -1.755             | N                |
| <i>Capn6</i>         | Calpain 6                                                                       | -1.726             | Y                |
| <i>Cited1</i>        | Cbp/p300-interacting transactivator with Glu/Asp-rich carboxy-terminal domain 1 | -1.642             | Y                |
| <i>Traf1</i>         | Tnf receptor-associated factor 1                                                | -1.583             | Y                |
| <i>Osr2</i>          | Odd-skipped related 2                                                           | -1.576             | N                |
| <i>Uncx4.1</i>       | UNC homeobox                                                                    | -1.571             | Y                |
| <i>Hnf4α</i>         | Hepatic nuclear factor 4, alpha                                                 | -1.539             | N                |
| <i>Irx2</i>          | Iroquois homeobox 2                                                             | -1.494             | N                |
| <i>Fgf8</i>          | Fibroblast growth factor 8                                                      | -1.466             | N                |
| <i>Sox9</i>          | Sry-related HMG-box, gene 9                                                     | -1.436             | N                |
| <i>Hnf1β</i>         | Hepatic nuclear factor 1, beta                                                  | -1.392             | N                |
| <i>Lhx1</i>          | LIM homeobox protein 1 (Lim1)                                                   | -1.376             | N                |
| <i>Ncam1</i>         | Neural cell adhesion molecule 1                                                 | -1.336             | Y                |
| <i>Pax8</i>          | Paired box gene 8                                                               | -1.314             | N                |
| <i>Pax2</i>          | Paired box gene 2                                                               | -1.285             | Y                |
